# Supplementary material for: The use of polyimide-modified aluminum nitride fillers in AlN@PI/Epoxy composites with enhanced thermal conductivity for electronic encapsulation
Source: PubMed Central journal article supplement — Sci Rep. 2014 Apr 24;4:4779. doi: 10.1038/srep04779 (PMC3998031; doi:10.1038/srep04779), 2014-04-24
Supplement: srep04779-s1.pdf [file srep04779-s1.pdf]

## Supplementary information

### **The use of polyimide-modified aluminum nitride fillers in AlN@PI/Epoxy composites with enhanced thermal conductivity for electronic encapsulation**

Yongcun Zhou<sup>1,2</sup>, Yagang Yao<sup>2,3</sup>, Chia-Yun Chen<sup>2</sup>, Kyoungsik Moon<sup>2</sup>, Hong Wang<sup>\*.1</sup>,  
& Ching-ping Wong<sup>\*.2,4</sup>

[\*] Prof. Hong Wang, Yongcun Zhou  
Electronic Materials Research Laboratory, Key Laboratory of Ministry of Education  
& International Center for Dielectric Research,  
Xi'an Jiaotong University, Xi'an 710049, (P.R. China)  
E-mail: hwang@mail.xjtu.edu.cn

Prof. C. P. Wong, Mr. Yongcun Zhou, Dr. Yagang Yao, Dr. Chia-Yun Chen,  
Dr. Kyoungsik Moon  
School of Materials Science and Engineering  
Georgia Institute of Technology  
Atlanta 30332 (USA)  
E-mail: cp.wong@mse.gatech.edu

Dr. Yagang Yao  
Suzhou Institute of Nano-tech and Nano-bionics, Chinese Academy of Sciences,  
Suzhou 215123, (P.R. China)

Prof. C. P. Wong  
Department of Electronic Engineering, Faculty of Engineering  
The Chinese University of Hong Kong  
ShaTin, Hong Kong

**Table S1.** Basic properties of the aluminum nitride, BTDA/ODA (PI) and epoxy.

|                                                              | <b>AlN</b>         | <b>BTDA/ODA (PI)</b> | <b>Epoxy</b>        |
|--------------------------------------------------------------|--------------------|----------------------|---------------------|
| Average particle size ( $\mu\text{m}$ )                      | 1                  | —                    | —                   |
| Density ( $\text{g cm}^{-3}$ )                               | 3.26               | 1.33                 | 2.75                |
| Thermal conductivity ( $\text{W mK}^{-1}$ )                  | 210                | 0.22                 | 0.19                |
| Coefficient of thermal expansion ( $^{\circ}\text{C}^{-1}$ ) | $4 \times 10^{-6}$ | $80 \times 10^{-6}$  | $65 \times 10^{-6}$ |
| Dielectric constant (1 MHz)                                  | 8.7                | 3.4                  | 5.3                 |
| Electrical resistivity ( $\Omega \text{ cm}$ )               | $>10^{14}$         | $>10^{16}$           | $>10^{15}$          |

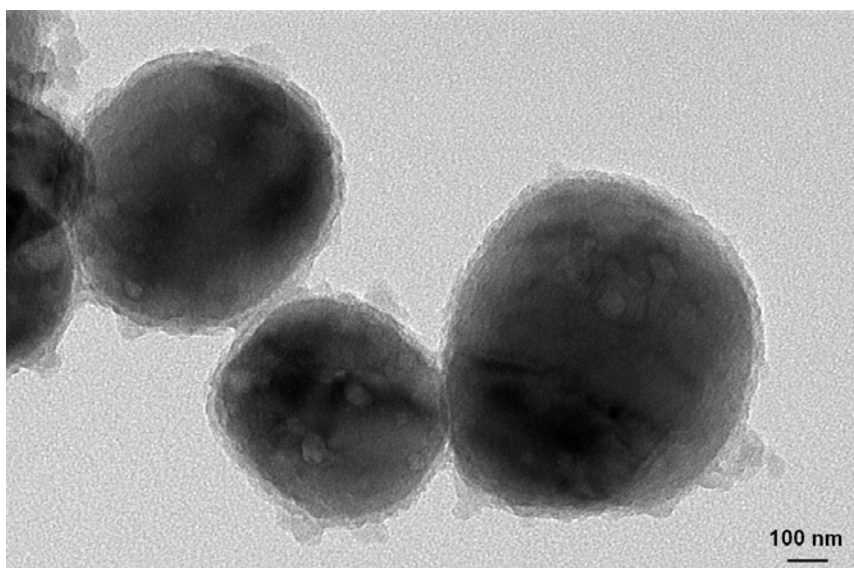

**Figure S1.** TEM image of PI modified AlN particles.
